# Supplementary material for: Room-Temperature H<sub>2</sub> Gas Sensing Characterization of Graphene-Doped Porous Silicon via a Facile Solution Dropping Method
Source: Preprints.org preprint supplement (doi:10.20944/preprints201710.0106.v1), 2017-10-16
Supplement: Supplementary file 1 [file supplementary]

## Room-Temperature H<sub>2</sub> Gas Sensing Characterization of Graphene-doped Porous Silicon *via* a Facile Solution Dropping Method

Nu Si A Eom<sup>1†</sup>, Hong-Baek Cho<sup>1†</sup>, Yoseb Song<sup>1</sup>, Woojin Lee<sup>2</sup>, Tohru Sekino<sup>3</sup> and Yong-Ho Choa<sup>1\*</sup>

<sup>1</sup> Department of Fusion Chemical Engineering, Hanyang University, Ansan, 15588, Republic of Korea.

<sup>2</sup> Process Development Team, Semiconductor R&D Center, Samsung Electronics Co., LTD, Samsungjeonja-ro 1, Hwaseong, Gyeonggi-do 445-330, Republic of Korea

<sup>3</sup> The Institute of Scientific and Industrial Research, Osaka University, 8-1 Mihogaoka, Ibaraki, Osaka, 567-0047, Japan

E-mail: choa15@hanyang.ac.kr (Y.-H. Choa)

†These authors contributed equally to this work.

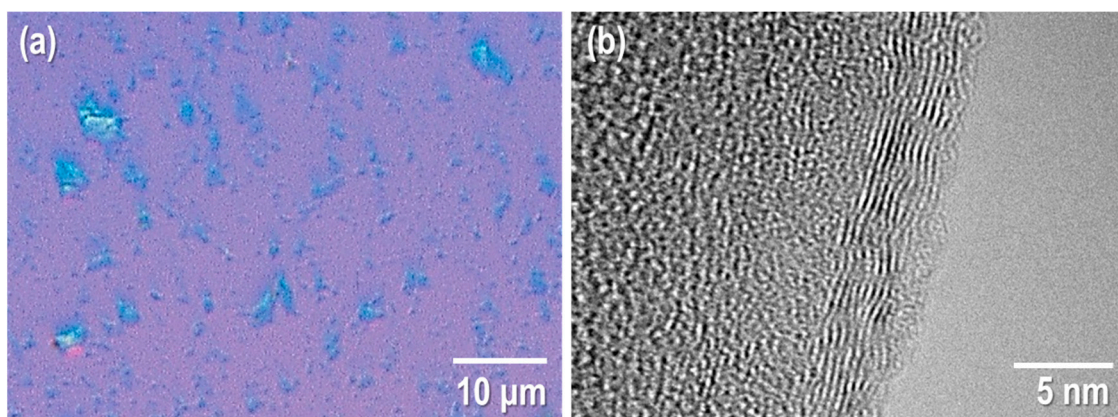

**Figure S1.** (a) Optical microscope (OM) and (b) TEM images of the as-received graphene.

The majority of graphene (except some aggregated domains on the top-right) deposited on the surface of a Si wafer were less than 5 μm in length, specifically 2-3 μm on average (Fig. S1(a)), and their thickness was less than 5 nm (Fig. S1(b)).

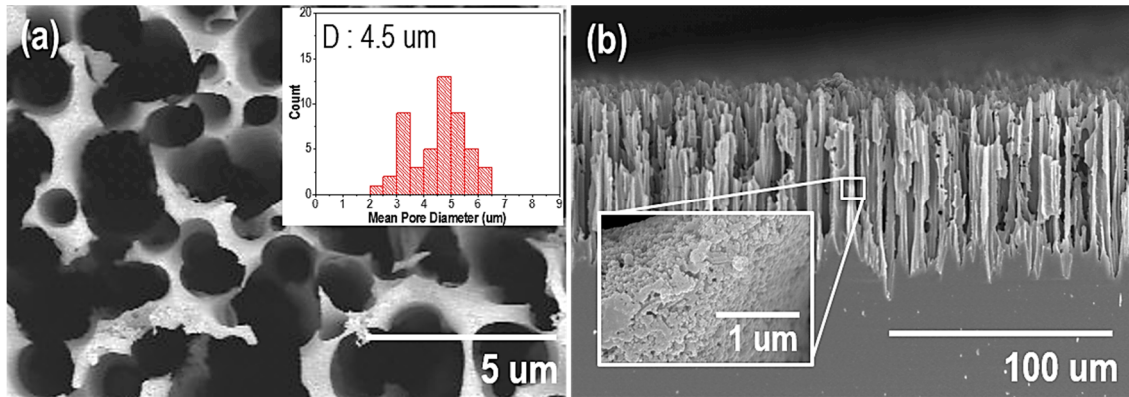

**Figure S2.** (a) Surface and (b) cross-sectional morphology of porosity generated on the pristine Si substrate with an average thickness of 90  $\mu\text{m}$ .

The surface image confirms the external pore diameter of Si was 4.5  $\mu\text{m}$  (Fig. S2(a)) and the cross-sectional image illustrates that the average thickness of the generated vertical pore depth was 90  $\mu\text{m}$ , where the pore tapered towards the inner pores (Fig. S2(b)).
